# Supplementary material for: Sensory Systems and Transcriptional Regulation in Escherichia coli
Source: Front Bioeng Biotechnol. 2022 Feb 14;10:823240. doi: 10.3389/fbioe.2022.823240 (PMC8882922; doi:10.3389/fbioe.2022.823240)
Supplement: Supplementary file 1 [file Table2.XLSX]

## Sheet: Table S2 description
Table S2 Effector molecules for TFs and Feedback identified
TFs with feedback detected computationally
Results of the TFs for which feedback was computationally identified in the GENSOR units.
TFs with no feedback detected computationally
Results of the TFs for which feedback was not computationally identified in the GENSOR units.
Possible matches for feedback detected computationally
List of TFs with compounds indentified computationally as related to the effector by similarity in the character string
Feedback summary
Summary of results from computational detection and manual curation, see Supplementary Table S3

## Sheet: TFs_with_comp_feedback
# TF	Efector(s)	No. of Efectors	Matches	No. of matches
AcrR	ethidium,R6G,Proflavin	3	ethidium	1
AlaS	L-alanine	1	L-alanine	1
AllR	allantoin,glyoxylate	2	glyoxylate	1
AlsR	D-allose	1	D-allose	1
ArgP	L-lysine,L-arginine	2	L-arginine,L-lysine	2
ArgR	L-arginine	1	L-arginine	1
ArsR	antimonite,arsenite	2	As(OH)3,arsenite	2
AsnC	L-asparagine	1	L-asparagine	1
BetI	choline	1	choline	1
CaiF	L-carnitine	1	L-carnitine	1
ChbR	N-monoacetylchitobiose 6'-phosphate	1	N-monoacetylchitobiose 6'-phosphate	1
Cra	beta-D-fructofuranose 1-phosphate	1	beta-D-fructofuranose 1-phosphate	1
CRP	cAMP	1	cAMP	1
CsqR	6-sulfo-D-quinovose	1	6-sulfo-D-quinovose	1
CueR	Ag,Au,Cu+	3	Cu+	1
CynR	cyanate	1	cyanate	1
CysB	N-acetyl-L-serine,O-acetyl-L-serine,Sulphide,Thiosulphate	4	O-acetyl-L-serine	1
CytR	cytidine	1	cytidine	1
Dan	L-tartrate	1	L-tartrate	1
DgoR	D-galactonate	1	D-galactonate	1
DhaR	DhaK	1	DhaK	1
DsdC	D-serine	1	D-serine	1
FhlA	formate	1	formate	1
FucR	L-fuculose 1-phosphate	1	L-fuculose 1-phosphate	1
Fur	Fe2+,Mn2+	2	Fe2+,Mn2+	2
GcvA	glycine,Purine	2	glycine	1
GlaR	glutarate	1	glutarate	1
GlcC	glycolate,Acetate	2	glycolate	1
GlpR	glycerol,sn-glycerol 3-phosphate	2	sn-glycerol 3-phosphate,glycerol	2
GntR	D-gluconate	1	D-gluconate	1
HcaR	3-phenylpropanoate	1	3-phenylpropanoate	1
IclR	pyruvate,glyoxylate	2	glyoxylate,glyox	2
IdnR	Idonate,5-dehydro-D-gluconate	2	5-dehydro-D-gluconate	1
IlvY	(S)-2-acetolactate,Alfa-acetohydroxybutirate	2	(S)-2-acetolactate	1
LacI	allolactose	1	allolactose	1
LldR	(S)-lactate	1	(S)-lactate	1
Lrp	L-leucine	1	L-leucine	1
LsrR	(2R,4S)-2-methyl-2,3,3,4-tetrahydroxytetrahydrofuran,autoinducer 2,(2S)-2-hydroxy-3,4-dioxopentyl phosphate	3	(2R,4S)-2-methyl-2,3,3,4-tetrahydroxytetrahydrofuran,autoinducer 2	2
MalT	MalY,MalK,ADP,maltotriose,Aes,ATP	6	MalK,maltotriose	2
MelR	melibiose	1	melibiose	1
MetJ	adenine,S-adenosyl-L-methionine,S-methyl-5'-thioadenosine	3	S-adenosyl-L-methionine	1
MetR	L-homocysteine	1	L-homocysteine	1
MhpR	3-(2,3-dihydroxyphenyl)propionate [DHPP],3-(3-hydroxyphenyl)propanoate	2	3-(3-hydroxyphenyl)propanoate	1
MntR	Mn2+,Cd2+	2	Mn2+	1
ModE	molybdate	1	molybdate	1
MprA	2,4-dinitrophenol,carbonylcyanide m-chlorophenylhydrazone,Carbonyl cyanide p-(trifluoro-methoxy)phenylhydrazone	3	carbonylcyanide m-chlorophenylhydrazone	1
MurR	N-acetyl-D-muramate 6-phosphate	1	N-acetyl-D-muramate 6-phosphate	1
NagC	N-acetyl-D-glucosamine 6-phosphate	1	N-acetyl-D-glucosamine 6-phosphate	1
NanR	N-acetylneuraminate	1	N-acetylneuraminate	1
NemR	methylglyoxal	1	methylglyoxal	1
NfeR	Fe2+,Ni2+	2	Fe2+	1
NhaR	Na+	1	Na+	1
NikR	Cu+,Ni2+,Zn2+,Co2+,Cd2+	5	Ni2+	1
NrdR	dATP,ATP,Zn2+	3	dATP	1
NsrR	[2Fe-2S] reduced,nitric oxide,[2Fe-2S]2+ oxidized	3	nitric oxide	1
PaaX	phenylacetyl-CoA	1	phenylacetyl-CoA	1
PdhR	pyruvate	1	pyruvate	1
PrpR	(2S,3S)-2-methylcitrate	1	(2S,3S)-2-methylcitrate	1
PuuR	putrescine	1	putrescine	1
RcnR	Co2+,Ni2+	2	Co2+,Ni2+	2
RhaS	L-rhamnose,alpha-L-rhamnopyranose	2	L-rhamnose	1
RutR	thymine,uracil	2	uracil,thymine	2
SrlR	D-sorbitol	1	D-sorbitol	1
TrpR	L-tryptophan	1	L-tryptophan	1
TyrR	L-phenylalanine,L-tryptophan,L-tyrosine	3	L-tryptophan,L-tyrosine,L-phenylalanine	3
UlaR	L-ascorbate 6-phosphate	1	L-ascorbate 6-phosphate	1
UxuR	alpha-D-glucuronate,alpha-D-galacturonate,D-fructuronate	3	D-fructuronate	1
XapR	xanthosine	1	xanthosine	1
XylR	alpha-D-xylopyranose	1	D-xylose	1
ZntR	Hg,Cd2+,Zn2+	3	Zn2+,Cd2+	2
Zur	Zn2+	1	Zn2+	1

## Sheet: TFs_no_comp_feedback
# TF	Efector
AllS	allantoin
AraC	D-fucose,alpha-L-arabinopyranose
BirA	biotinyl-5'-adenylate
Cbl	Thiosulphate
ComR	cuprous ion
DnaA	adenosine-triphosphate
ExuR	alpha-D-glucuronate,alpha-D-galacturonate
FadR	acyl-Coenzyme A
GalR	D-galactose
GalS	D-galactose
MarR	2-HBA
PurR	Guanine
PyrR	pyruvate
RbsR	ribose
RhaR	L-mannomethylose
TreR	D-trehalose 6-phosphate,Trehalose

## Sheet: TFs_possible_matches_feedback
# TF	Ef.synonym	match
AraC	alpha-L-arabinopyranose	L-arabinopyranose
AraC	arabinose	L-arabinose
AraC	alpha-L-arabinose	L-arabinose
ExuR	alpha-D-galacturonate	D-galacturonate
ExuR	alpha-D-glucuronate	D-glucuronate
TreR	trehalose 6-phosphate	alpha,alpha-trehalose 6-phosphate
TreR	D-trehalose 6-phosphate	alpha,alpha-trehalose 6-phosphate

## Sheet: feedback_summary
Number of TFs with GU: 204
Number of TFs with known effector: 90
Number of TFs with known effector and GU: 87
Number of TFs with feedback detected by the computational program: 71
Number of TFs with feedback detected by manual curation: 12
Number of TFs missing feedback detected by manual curation: 4
Percentage of feedback in the network detected computationally: 81.6%
