# Supplementary material for: Sensory Systems and Transcriptional Regulation in Escherichia coli
Source: Front Bioeng Biotechnol. 2022 Feb 14;10:823240. doi: 10.3389/fbioe.2022.823240 (PMC8882922; doi:10.3389/fbioe.2022.823240)
Supplement: Supplementary file 2 [file Table3.XLSX]

## Sheet: Hoja1
Supplementary table 3. Curation manual of feedback in GUs
TF	Effector	Compound metabolized or transported	Feedback in the GU	Ontology level (effector|compound in non allosteric reaction)	Effector proccesing in GU
AraC	α-L-arabinopyranose	L-arabinose	yes	Compound|class	Imported by AraF-AraG-AraH
ExuR	α-D-glucuronate	D-glucuronate	yes	Compound|class	Transported by ExuT
FadR	an acyl-CoA	a 2,3,4-saturated fatty acyl CoA	yes	Class| subclass	Consumed by FadE
GalR	D-galactose	α-D-galactopyranose	yes	Class| compound	Produced by GalM
GalS	D-galactose	α-D-galactopyranose	yes	Class| compound	Produced by GalM
RbsR	D-ribose	D-ribopyranose	yes	Class| subclass	Imported by RbsA
TreR	D-trehalose 6-phosphate	α,α-trehalose 6-phosphate	yes	Class|compound	Imported by TreB
PurR	Hypoxanthine	-	Feedback not found because of limited knowledge	Compound|-	-
PyrR	Pyruvate	-	Feedback not found because of limited knowledge	Compound|-	-
ComR	Cu+	-	Feedback not found because of limited knowledge	Compound|-	-
MarR	Salicylate	-	Feedback not found because of limited knowledge	Compound|-	-
Cbl	adenosine 5'-phosphosulfate	adenosine 5'-phosphosulfate	Found in the complex GU of Cbl/CysB	Compound | compound	Consumed by CysC
RhaR	α-L-rhamnopyranose	L-rhamnose	Found in the complex GU RhaR/RhaS	Subclass|class	Transported by RhaT
AllS	Allantoin	(S)-(+)-allantoin	Found in the complex GU AllR/AllS	Class |compound	Consumed by AllB
BirA	biotinyl-5´-adenylate	biotinyl-5´-adenylate	yes	Compound | compound	Synthesized by BirA
DnaA	ATP	ATP	yes	Compound | compound	Consumed by DnaA
