# Supplementary material for: Sensory Systems and Transcriptional Regulation in Escherichia coli
Source: Front Bioeng Biotechnol. 2022 Feb 14;10:823240. doi: 10.3389/fbioe.2022.823240 (PMC8882922; doi:10.3389/fbioe.2022.823240)
Supplement: Supplementary file 3 [file Table1.XLSX]

## Sheet: Table S1 Description
Table S1 Mechanisms of signal-to-TF transduction
TFs-allosteric-regulation
TFs modulated by allosteric regulation, the effector molecules, and the TF holo conformations with effectors bound.
In bold new changes done in the database in order for all TF conformations to have the main name of the bound effector
TFs-two-component system
TFs belong to two-component systems and their conformation
TFs-protein-protein binding
TFs modulated by protein-protein interaction.
We added only those where the protein-protein interaction modulates the signal-to-TF transduction
TFs-covalent regulation
TFs modulated by covalent modifications

## Sheet: TFs-allosteric-regulation
Transcriptional factor	Allosteric effector	TF conformation
AcrR	ethidium	AcrR-ethidium
AlaS	L-alanine	AlaS-L-alanine
AllR	allantoin	AllR-allantoin
AllR	glyoxylate	AllR-glyoxylate
AllS	allantoin	AllS-allantoin
AlsR	D-allose	AlsR-D-allose
AraC	α-L-arabinopyranose	AraC-α-L-arabinopyranose
ArgP	L-arginine	ArgP-L-arginine
ArgP	L-lysine	ArgP-L-lysine
ArgR	L-arginine	ArgR-L-arginine
ArsR	antimonite	ArsR-antimonite
ArsR	arsenite	ArsR-arsenite
AsnC	L-asparagine	AsnC-L-asparagine
BetI	choline	BetI-choline
BirA	biotinyl-5'-adenylate	BirA-biotinyl-5'-adenylate
CaiF	L-carnitine	CaiF-L-carnitine
Cbl	adenosine 5'-phosphosulfate	Cbl-adenosine 5'-phosphosulfate
ChbR	N-monoacetylchitobiose 6'-phosphate	ChbR-6-phospho-β-D-glucosaminyl-(1->4)-N-acetyl-D-glucosamine
ComR	Cu+	ComR-Cu+
Cra	β-D-fructofuranose 1-phosphate	Cra-β-D-fructofuranose 1-phosphate
CRP	cyclic-AMP	CRP-cyclic-AMP
CsqR	6-sulfo-D-quinovose	CsqR-6-sulfo-D-quinovose
CueR	Cu+	CueR-Cu+
CynR	cyanate	CynR-cyanate
CysB	O-acetyl-L-serine	CysB-O-acetyl-L-serine
CytR	cytidine	CytR-cytidine
Dan	L-tartrate	Dan-L-tartrate
DgoR	D-galactonate	DgoR-D-galactonate
DnaA	ATP	DnaA-ATP
LldR	S-lactate	LldR-S-lactate
DsdC	D-serine	DsdC-D-serine
ExuR	α-D-galacturonate	ExuR-α-D-galacturonate, α-D-glucuronate
ExuR	α-D-glucuronate	ExuR-α-D-glucuronate
FadR	an acyl-CoA	FadR-an acyl-CoA
FhlA	formate	FhlA-formate
FrmR	formaldehyde	FrmR-formaldehyde
FucR	L-fuculose 1-phosphate	FucR-L-fuculose 1-phosphate
Fur	Fe2+	Fur-Fe2+
GalR	D-galactose	GalR-D-galactose
GalS	D-galactose	GalS-D-galactose
GcvA	glycine	GcvA-glycine
GlaR	glutarate	GlaR-glutarate
GlcC	glycolate	GlcC-glycolate
GlpR	glycerol	GlpR-glycerol
GlpR	sn-glycerol 3-phosphate	GlpR-sn-glycerol 3-phosphate
GntR	D-gluconate	GntR-D-gluconate
SrlR	D-sorbitol	SrlR-D-sorbitol
HcaR	3-phenylpropanoate	HcaR-3-phenylpropanoate
IclR	glyoxylate	IclR-glyoxylate
IclR	pyruvate	IclR-pyruvate
IdnR	5-dehydro-D-gluconate	IdnR-5-dehydro-D-gluconate
IlvY	(S)-2-acetolactate	IlvY-(S)-2-acetolactate
IscR	a [2Fe-2S] iron-sulfur cluster	IscR-a [2Fe-2S] iron-sulfur cluster
LacI	allolactose	LacI-allolactose
Lrp	L-leucine	Lrp-L-leucine
LsrR	(2S)-2-hydroxy-3,4-dioxopentyl phosphate	LsrR-(2S)-2-hydroxy-3,4-dioxopentyl phosphate
LsrR	(2R,4S)-2-methyl-2,3,3,4-tetrahydroxytetrahydrofuran	LsrR-(2R,4S)-2-methyl-2,3,3,4-tetrahydroxytetrahydrofuran
LsrR	autoinducer 2	LsrR-autoinducer 2
MalT	ATP	MalT-maltotriose-ATP
MalT	maltotriose	MalT-maltotriose-ATP
MarR	salicylate	MarR-salicylate
MelR	melibiose	MelR-melibiose
MetJ	S-adenosyl-L-methionine	MetJ-S-adenosyl-L-methionine
MetR	L-homocysteine	MetR-L-homocysteine
MhpR	3-(3-hydroxyphenyl)propanoate	MhpR-3-(3-hydroxyphenyl)propanoate
MntR	Mn<SUP>2+</SUP>	MntR-Mn2+
ModE	molybdate	ModE-molybdate
MprA	2,4-dinitrophenol	MprA-2,4-dinitrophenol
MprA	carbonylcyanide m-chlorophenylhydrazone	MprA-carbonylcyanide m-chlorophenylhydrazone
MurR	N-acetyl-D-muramate 6-phosphate	MurR-N-acetyl-D-muramate 6-phosphate
NagC	N-acetyl-D-glucosamine 6-phosphate	NagC-N-acetyl-D-glucosamine 6-phosphate
NanR	N-acetylneuraminate	NanR-N-acetylneuraminate
NemR	methylglyoxal	NemR-methylglyoxal
NfeR	Ni2+	NfeR-Ni2+
NhaR	Na+	NhaR-Na+
NikR	Ni2+	NikR-Ni2+
NrdR	Zn2+	NrdR-Zn2+
NsrR	nitric oxide	NsrR-nitric oxide
PaaX	phenylacetyl-CoA	PaaX-phenylacetyl-CoA
PdhR	pyruvate	PdhR-pyruvate
PrpR	(2S,3S)-2-methylcitrate	PrpR-(2S,3S)-2-methylcitrate
PurR	hypoxanthine	PurR-hypoxanthine
PuuR	putrescine	PuuR-putrescine
PyrR	pyruvate	PyrR-pyruvate
RbsR	D-ribose	RbsR-D-ribose
RcnR	Co2+	RcnR-Co2+
RcnR	Ni2+	RcnR-Ni2+
RhaR	L-rhamnose	RhaR-L-rhamnose
RhaS	L-rhamnose	RhaS-L-rhamnose
RutR	thymine	RutR-thymine
RutR	uracil	RutR-uracil
TreR	D-trehalose 6-phosphate	TreR-D-trehalose 6-phosphate
TrpR	L-tryptophan	TrpR-L-tryptophan
TyrR	L-phenylalanine	TyrR-L-phenylalanine
TyrR	L-tyrosine	TyrR-L-tyrosine
UlaR	L-ascorbate 6-phosphate	UlaR-L-ascorbate 6-phosphate
UxuR	α-D-galacturonate	UxuR-α-D-galacturonate, α-D-glucuronate
UxuR	α-D-glucuronate	UxuR-α-D-galacturonate, α-D-glucuronate
UxuR	D-fructuronate	UxuR-D-fructuronate
XapR	xanthosine	XapR-xanthosine
XylR	α-D-xylopyranose	XylR-α-D-xylopyranose
XynR	D-xylonate	XynR-D-xylonate
YebK	2-dehydro-3-deoxy-D-gluconate 6-phosphate	YebK-2-dehydro-3-deoxy-D-gluconate 6-phosphate
ZntR	Zn2+	ZntR-Zn2+
Zur	Zn2+	Zur-Zn2+

## Sheet: TFs-two-component system
TF	TF conformation
ArcA	ArcA-phosphorylated
AtoC	AtoC-phosphorylated
BaeR	BaeR-phosphorylated
BasR	BasR-phosphorylated
BolA	BolA-phosphorylated
BtsR	BtsR-phosphorylated
CpxR	CpxR-phosphorylated
CreB	CreB-phosphorylated
CusR	CusR-phosphorylated
DcuR	DcuR-phosphorylated
DpiA	DpiA-phosphorylated
EvgA	EvgA-phosphorylated
GlrR	GlrR-phosphorylated
HprR	HprR-phosphorylated
KdpE	KdpE-phosphorylated
NarL	NarL-phosphorylated
NarP	NarP-phosphorylated
NtrC	NtrC-phosphorylated
OmpR	OmpR-phosphorylated
PhoB	PhoB-phosphorylated
PhoP	PhoP-phosphorylated
PyrR	PyrR-phosphorylated
QseB	QseB-phosphorylated
RcsB	RcsB-phosphorylated
RstA	RstA-phosphorylated
UhpA	UhpA-phosphorylated
UvrY	UvrY-phosphorylated
ZraR	ZraR-phosphorylated
TorR	TorR-phosphorylated

## Sheet: TFs-protein-protein binding
TF	TF regulation type	TF conformation
CRP-Sxy	protein-binding	CRP-Sxy
DhaR	protein-binding	DhaR-DhaK
GadE-RcsB	protein-binding	GadE-RcsB
MalT	protein-binding	MalT-Aes
MalT	protein-binding	MalT-MalY
Mlc	protein-binding	Mlc-PtsG
RcsB-BglJ	protein-binding	RcsB-BglJ
TorR	protein-binding	TorR-TorI
DinJ-YafQ	toxin-antitoxin	DinJ-YafQ
HigBA	toxin-antitoxin	HigBA
HipAB	toxin-antitoxin	HipAB
MazE-MazF	toxin-antitoxin	MazE-MazF
RelB-RelE	toxin-antitoxin	RelB-RelE
YefM-YoeB	toxin-antitoxin	YefM-YoeB
			En 2 listas

## Sheet: TFs-covalent regulation
TF	TF regulation type	TF conformation
Ada	Methylation	Ada-Methylated
FNR	oxidation/reduction	FNR-[4Fe-4S] reduced | FNR-[2Fe-2S] oxidized
NsrR	oxidation/reduction	NsrR-[2Fe-2S]reduced | NsrR-[2Fe-2S] oxidized
SoxR	oxidation/reduction	SoxR-[2Fe-2S] oxydized | SoxR-[2Fe-2S] reduced
RcsB	Acetylation	RcsB-acetylated
